# Supplementary material for: Systematic review to understand and improve care after stillbirth: a review of parents’ and healthcare professionals’ experiences
Source: Springer Nature journal article supplement (doi:10.1186/s12884-016-0806-2), 2016-01-25
Supplement: MOESM1 [file 9743706]

## Appendix 1: Search Strategy

Synonyms searched:

|                        |                                                                                                                                                                                  |
|------------------------|----------------------------------------------------------------------------------------------------------------------------------------------------------------------------------|
| Sample                 | Mother, father, mum, dad, parent, couple, family, patient, woman, women, men, male, female, midwife, midwifery, nurse, doctor, medical, obstetrician, staff, healthcare worker   |
| Phenomenon of Interest | Stillbirth, intrauterine death, intra-uterine death, in-utero death, IUD, IUFD, fetal loss, foetal loss, fetal death, foetal death, fetal demise, foetal demise, perinatal death |
| Design                 | All types of study will be included                                                                                                                                              |
| Evaluation             | Attitude, experience, perspective, opinion, view, theme, interview, focus group, questionnaire, survey                                                                           |
| Research type          | Qualitative studies, quantitative studies, and mixed method studies                                                                                                              |

MeSH headings searched by database:

Medline:

exp PARENTS/

FAMILY/

WOMEN/

MEN/

MIDWIFERY/

NURSES/

PHYSICIANS/

HEALTH PERSONNEL/

STILLBIRTH/

FETAL DEATH/

PERINATAL MORTALITY/

ATTITUDE/  
INTERVIEW/  
INTERVIEWS AS TOPIC/  
QUESTIONNAIRES/  
FOCUS GROUPS/  
QUALITATIVE RESEARCH/  
  
ABORTION, SPONTANEOUS/

EMBASE:

PARENT/  
FATHER/  
MOTHER/  
FAMILY/  
FEMALE/  
MALE/  
MIDWIFE/  
NURSE/  
PHYSICIAN/  
HEALTH CARE PERSONNEL/  
HEALTH PRACTITIONER/  
  
STILLBIRTH/  
FETUS DEATH/  
PERINATAL MORTALITY/  
  
ATTITUDE/  
INTERVIEW/  
QUESTIONNAIRE/  
QUALITATIVE RESEARCH/

SPONTANEOUS ABORTION/

CINAHL:

exp PARENTS/

FAMILY/

WOMEN/

MEN/

MIDWIFERY/

NURSES/

PHYSICIANS/

exp HEALTH PERSONNEL/

PERINATAL DEATH/

ATTITUDE/

INTERVIEWS/

QUESTIONNAIRES/

FOCUS GROUPS/

QUALITATIVE STUDIES/

SURVEYS/

BNI:

FAMILY/

exp MIDWIFERY/

NURSES: ENROLLED/

STAFF NURSES/

PERINATAL AND NEONATAL MORTALITY/

exp DEATH: ATTITUDES

exp PATIENTS: ATTITUDES AND PERCEPTIONS

exp STAFF: ATTITUDES

INTERVIEWS AND INTERVIEWING/

ABORTION: SPONTANEOUS/

PsycINFO:

PARENTS/

FATHERS/

MOTHERS/

FAMILY/

HUMAN FEMALES/

HUMAN MALES/

MIDWIFERY/

NURSES/

PHYSICIANS/

OBSTETRICIANS/

HEALTH PERSONNEL/

ATTITUDES/

INTERVIEWS/

QUESTIONNAIRES/

QUALITATIVE RESEARCH/

SURVEYS/

SPONTANEOUS ABORTION/

AMED:

exp PARENTS/

FAMILY/

WOMEN/

MEN/

MIDWIFERY/

NURSES/

PHYSICIANS/

HEALTH PERSONNEL/

FETAL DEATH/

ATTITUDE/

INTERVIEWS/

QUESTIONNAIRES/
